# Supplementary material
Source: bioRxiv or medRxiv preprint supplement (https://www.biorxiv.org/highwire/filestream/8777/field_highwire_adjunct_files/3/018861-4.pdf)

# Appendix 4: Results

Inferring species interactions from co-occurrence data with Markov networks

*David J. Harris*

```
library(dplyr)
library(mgcv)
library(ggplot2)
library(tidyr)
library(knitr)
library(lme4)
```

Import the results from Appendix 4:

```
x = read.csv("estimates.csv", stringsAsFactors = FALSE)
x$simulation_type = gsub("[0-9]", "", x$rep_name)
```

Import the results from the *Pairs* software:

```
pairs_txt = readLines("fakedata/matrices/Pairs.txt")
library(stringr)

# Find areas of the data file that correspond
# to species pairs' results
beginnings = grep("Sp1", pairs_txt) + 1
ends = c(
  grep("[^ ]", pairs_txt)[-1],
  length(pairs_txt) + 1
) - 1

partial_names = sapply(
  strsplit(grep(">", pairs_txt, value = TRUE), "+"),
  function(x) x[[3]]
)
filename_lines = grep(">", pairs_txt)

# Sort a vector of alphanumeric strings by the numeric component
# as if they were integers. For example, V20 is larger than V12,
# even though V12 comes first alphabetically
alnum_sort = function(x){
  raw = as.integer(gsub("[[:alpha:]]", "", x))
```

```

x[order(raw)]
}

pairs_results = lapply(
  1:length(filename_lines),
  function(i){

    n_sites = as.integer(strsplit(partial_names[[i]], "-")[[1]][[1]])
    rep_name = strsplit(partial_names[[i]], "-")[[1]][[2]]

    # Find the line where the current data set is mentioned in
    # pairs.txt
    filename_line = filename_lines[i]

    # Which chunk of the data file corresponds to this file?
    chunk = min(which(beginnings > filename_line))

    # Split the chunk on whitespace.
    splitted = strsplit(pairs_txt[beginnings[chunk]:ends[chunk]], " ")

    # Pull out the corresponding chunk of the "x" data frame, based on n_sites and rep_name
    x_subset = x[x$n_sites == n_sites & x$rep_name == rep_name & x$method == "correlation", ]

    # Pull out the species numbers and their Z-scores, then join to x_subset
    pairs_results = lapply(
      splitted,
      function(x){
        # in the x data frame, species 1 is always a lower number than species 2
        spp = alnum_sort(x[3:4])
        data.frame(
          sp1 = spp[1],
          sp2 = spp[2],
          z = x[14],
          stringsAsFactors = FALSE
        )
      }
    ) %>%
    bind_rows %>%
    mutate(spp = paste(sp1, sp2, sep = "-"))

    n_spp = 20

    pairs_results$z = as.numeric(pairs_results$z)

    # Re-order the pairs_results to match the other methods
    m = matrix(NA, n_spp, n_spp)
  }
)

```

```

new_order = match(
  paste0("V", row(m)[upper.tri(m)], "-V", col(m)[upper.tri(m)]),
  pairs_results$spp
)
ordered_pairs_results = pairs_results[na.omit(new_order), ]

ordered_pairs_results = ordered_pairs_results %>%
  filter(sp1 %in% c(x_subset$sp1) & sp2 %in% x_subset$sp2)

x_subset$estimate = ordered_pairs_results$z
x_subset$method = "null"

x_subset
}
) %>% bind_rows()

# Manually adjust the Z values less than -1000 so that these outliers
# won't completely dominate the analyses below
pairs_results$estimate[pairs_results$estimate < -1000] = -50

x = rbind(x, pairs_results)

```

Calculate model performance:

```

resids = function(data){
  resid(lm(truth ~ estimate + 0, data = data))
}

result_summary = x %>%
  group_by(method, simulation_type) %>%
  do(data.frame(., resids = resids(.))) %>%
  ungroup %>%
  group_by(method, simulation_type, n_sites) %>%
  summarise(r2 = 1 - sum(resids^2) / sum(truth^2))

result_summary$method = reorder(result_summary$method, -result_summary$r2)

result_summary$simulation_type = reorder(result_summary$simulation_type, -result_summary$r2)

result_summary = result_summary %>%
  group_by(method) %>%
  summarise(mean_r2 = round(100 * mean(r2))) %>%
  mutate(method_r2 = paste0(method, " (0.", mean_r2, ")")) %>%
  select(method, method_r2) %>%

```

```

inner_join(result_summary, "method")

result_summary$simulation_type_long = plyr::revalue(
  result_summary$simulation_type,
  c(no_env = "constant environment",
    env = "heterogeneous environment",
    abund = "abundance")
)

result_summary$method_r2 = reorder(result_summary$method_r2, -result_summary$r2)

```

### Model performance with no environmental variation:

```

result_summary %>%
  filter(simulation_type == "no_env") %>%
  group_by(method) %>%
  summarise(mean(r2)) %>%
  kable(digits = 3)

```

| method              | mean(r2) |
|---------------------|----------|
| Markov network      | 0.525    |
| GLM                 | 0.472    |
| partial correlation | 0.403    |
| partial BayesComm   | 0.394    |
| correlation         | 0.291    |
| null                | 0.227    |
| BayesComm           | 0.206    |

### Model performance with environmental heterogeneity:

```

result_summary %>%
  filter(simulation_type == "env") %>%
  group_by(method) %>%
  summarise(mean(r2)) %>%
  kable(digits = 3)

```

| method              | mean(r2) |
|---------------------|----------|
| Markov network      | 0.451    |
| GLM                 | 0.405    |
| partial correlation | 0.322    |
| partial BayesComm   | 0.302    |
| correlation         | 0.183    |
| null                | 0.125    |

| method    | mean(r2) |
|-----------|----------|
| BayesComm | 0.110    |

Model performance with per-capita species interactions:

```
result_summary %>%
  filter(simulation_type == "abund") %>%
  group_by(method) %>%
  summarise(mean(r2)) %>%
  kable(digits = 3)
```

| method              | mean(r2) |
|---------------------|----------|
| Markov network      | 0.384    |
| GLM                 | 0.283    |
| partial correlation | 0.200    |
| partial BayesComm   | 0.166    |
| correlation         | 0.117    |
| null                | 0.075    |
| BayesComm           | 0.060    |

Plot the R-squared results (Figure 3)

```
legend_name = expression(Method~(mean~R2))

pdf("manuscript-materials/figures/performance.pdf", width = 8, height = 2.5)
ggplot(result_summary, aes(x = n_sites, y = r2, col = method_r2, shape = method_r2)) +
  facet_grid(~simulation_type_long) +
  geom_line(size = .5) +
  geom_point(size = 2.5, fill = "white") +
  scale_shape_manual(values = c(16, 22, 17, 23, 18, 24, 15), name = legend_name) +
  geom_hline(yintercept = 0, size = 1/2) +
  geom_vline(xintercept = 0, size = 1) +
  #scale_shape_manual(values = c(21, 25, 15, 18)) +
  coord_cartesian(ylim = c(-.01, 0.76)) +
  ylab(expression(R2)) +
  xlab("Number of sites (log scale)") +
  scale_x_log10(breaks = unique(x$n_sites), limits = range(x$n_sites)) +
  theme_bw(base_size = 11) +
  theme(panel.margin = grid::unit(1.25, "lines")) +
  theme(panel.border = element_blank(), axis.line = element_blank()) +
  theme(
    panel.grid.minor = element_blank(),
    panel.grid.major.y = element_line(color = "lightgray", size = 1/4),
```

```

    panel.grid.major.x = element_blank()
  ) +
  theme(strip.background = element_blank(), legend.key = element_blank()) +
  theme(plot.margin = grid::unit(c(.01, .01, .75, .1), "lines")) +
  theme(
    axis.title.x = element_text(vjust = -0.2, size = 12),
    axis.title.y = element_text(angle = 0, hjust = -.1, size = 12)
  ) +
  scale_color_brewer(palette = "Dark2", name = legend_name)
dev.off()

```

```
## pdf
## 2
```

## Estimate R-squared uncertainty:

Fit a linear mixed model describing R-squared as a function of method, landscape size, and simulation type. Note the small standard errors associated with the effect of estimation method.

```

landscape_estimates = x %>%
  group_by(method, simulation_type) %>%
  do(data.frame(., resids = resids(.))) %>%
  ungroup %>%
  group_by(method, simulation_type, rep_name, n_sites) %>%
  summarise(r2 = 1 - sum(resids^2) / sum(truth^2))

summary(
  lmer(
    r2 ~ method + n_sites + simulation_type + (1|rep_name),
    data = landscape_estimates
  )
)

```

```

## Linear mixed model fit by REML ['lmerMod']
## Formula: r2 ~ method + n_sites + simulation_type + (1 | rep_name)
## Data: landscape_estimates
##
## REML criterion at convergence: -4945.2
##
## Scaled residuals:
##   Min       1Q   Median       3Q      Max
## -7.3997 -0.6350  0.0758  0.6883  2.7104
##
## Random effects:
## Groups   Name              Variance Std.Dev.

```

```

## rep_name (Intercept) 0.0008304 0.02882
## Residual 0.0113238 0.10641
## Number of obs: 3150, groups: rep_name, 150
##
## Fixed effects:
## Estimate Std. Error t value
## (Intercept) -2.481e-02 7.186e-03 -3.45
## methodcorrelation 6.965e-02 7.094e-03 9.82
## methodGLM 2.544e-01 7.094e-03 35.85
## methodMarkov network 3.217e-01 7.094e-03 45.35
## methodnull 1.504e-02 7.094e-03 2.12
## methodpartial BayesComm 1.616e-01 7.094e-03 22.78
## methodpartial correlation 1.796e-01 7.094e-03 25.31
## n_sites 1.050e-04 2.690e-06 39.04
## simulation_typeenv 8.853e-02 7.402e-03 11.96
## simulation_typedno_env 1.795e-01 7.402e-03 24.25
##
## Correlation of Fixed Effects:
## (Intr) mthdcr mthGLM mthdMn mthdnl mtBysC mthdpc n_sits smltn_
## methdcrrltn -0.494
## methodGLM -0.494 0.500
## mthdMrkvntw -0.494 0.500 0.500
## methodnull -0.494 0.500 0.500 0.500
## mthdprrtBysC -0.494 0.500 0.500 0.500 0.500
## mthdprrtlcrr -0.494 0.500 0.500 0.500 0.500 0.500
## n_sites -0.228 0.000 0.000 0.000 0.000 0.000 0.000
## smltn_typednv -0.515 0.000 0.000 0.000 0.000 0.000 0.000 0.000
## smltn_typedn_ -0.515 0.000 0.000 0.000 0.000 0.000 0.000 0.000 0.500

```

Summarize the inferential results of the Markov network and the null model:

```

pairs_summary = x[x$method == "null" & !grepl("pop", x$rep_name), ]
markov_summary = x[x$method == "Markov network" & !grepl("pop", x$rep_name), ]

# Pairs's Z score is based on C-scores, which are positive when species are
# disaggregated. So significantly positive interactions == negative estimates
pairs_summary$sig_pos = pairs_summary$estimate < qnorm(.025)
pairs_summary$sig_neg = pairs_summary$estimate > qnorm(.975)

# Markov network is significant when lower bound is above zero or lower bound is
# below zero
markov_summary$sig_pos = markov_summary$lower > 0
markov_summary$sig_neg = markov_summary$upper < 0

```

## Create Figure 4:

```
# Function for smoothing the error rates with a generalized additive model
# and plotting the results
my_geom_smooth = function(data, color, ...){
  geom_smooth(
    data = data,
    aes(
      x = truth,
      y = as.integer((sig_neg & truth > 0) | (sig_pos & truth < 0)),
      color = color
    ),
    method = gam,
    family = binomial,
    formula = y ~ s(x),
    se = FALSE,
    n = 1024,
    ...
  )
}

truth_seq = seq(min(markov_summary$truth), max(markov_summary$truth), length = 1000)

plotfun = function(..., add){
  if(add){
    lines(...)
  }else{
    plot(...)
  }
}

error_smoother = function(data){
  predict(
    gam(
      I((sig_neg & truth > 0) | (sig_pos & truth < 0)) ~ s(truth),
      data = data,
      family = binomial
    ),
    data.frame(truth = truth_seq),
    type = "response"
  )
}

y_pairs = error_smoother(pairs_summary)
y_markov = error_smoother(markov_summary)
```



```
pdf("manuscript-materials/figures/error_rates.pdf", height = 8.5, width = 8.5/3)
par(mfrow = c(3, 1))

# Compare estimates
spread_estimates = x %>%
  dplyr::select(-lower, -upper, -X) %>%
  spread(method, estimate) %>%
  na.omit()

# R-squared for null versus correlation
round(summary(lm(null ~ I(correlation*sqrt(n_sites))), data = spread_estimates))$r.squared, 2)
```

```
## [1] 0.95
```

```
# R-squared for glm markov network versus glm
round(summary(lm(`Markov network` ~ GLM, data = spread_estimates))$r.squared, 2)
```

```
## [1] 0.94
```

```
with(
  spread_estimates,
  plot(
    `Markov network`,
    GLM,
    pch = ".",
    col = "#00000020",
    ylab = "Markov network estimate",
    xlab = "GLM estimate",
    bty = "l"
  )
)
mtext("A. Markov network estimates\nvs. GLM estimates", adj = 0, side = 3,
      font = 2, line = 1.2, cex = .9)
abline(lm(`Markov network` ~ GLM, data = spread_estimates))
text(0, 5, expression(R^2==0.94))

with(
  spread_estimates,
  plot(
    correlation * sqrt(n_sites),
    null,
    pch = ".",
    col = "#00000020",
    ylab = "Z-score",
    xlab = expression("correlation" %*% sqrt(number~~of~~sites)),
```

```

    bty = "l"
  )
)
mtext("B. Null model estimates vs.\nscaled correlation coefficients",
      adj = 0, side = 3, font = 2, line = 1.2, cex = .9)
abline(lm(null ~ I(correlation*sqrt(n_sites)), data = spread_estimates))
text(10, 12, expression(R^2==0.95))

plotfun(
  truth_seq,
  y_pairs,
  type = "l",
  xlab = "\"True\" interaction strength",
  ylab = "P(confidently predict wrong sign)",
  bty = "l",
  yaxs = "i",
  col = 2,
  add = FALSE,
  ylim = c(0, .4),
  lwd = 2
)
mtext("C. Error rate vs.\ninteraction strength", side = 3, adj = 0,
      font = 2, line = 1.2, cex = .9)
plotfun(truth_seq, y_markov, add = TRUE, lwd = 2)
legend("topleft", lwd = 2, legend = c("Null model", "Markov network"),
      col = c(2, 1), bty = "n")
dev.off()

```

```
## pdf
## 2
```

Summarize inferential statistics:

```

# P(Pairs confidently wrong)
with(pairs_summary, mean((sig_neg & truth > 0) | (sig_pos & truth < 0)))

```

```
## [1] 0.1533758
```

```

# P(Markov network confidently wrong)
with(markov_summary, mean((sig_neg & truth > 0) | (sig_pos & truth < 0)))

```

```
## [1] 0.02861541
```

```
# P(Pairs rejects null)
with(pairs_summary, mean(sig_neg | sig_pos))
```

```
## [1] 0.4520535
```

```
# P(Markov network rejects null)
with(markov_summary, mean(sig_neg | sig_pos))
```

```
## [1] 0.2116561
```

```
# P(reject null | small interaction) for Makrov network
# (approximate Type I error rates)
markov_summary %>%
  group_by(simulation_type) %>%
  filter(abs(truth) < .1) %>%
  summarize(Type_1_error_rate = mean(sig_neg | sig_pos)) %>%
  kable(digits = 3)
```

| simulation_type | Type_1_error_rate |
|-----------------|-------------------|
| abund           | 0.220             |
| env             | 0.136             |
| no_env          | 0.019             |

```
# P(reject null | small interaction) for Pairs
# (approximate Type I error rates)
pairs_summary %>%
  group_by(simulation_type) %>%
  filter(abs(truth) < .1) %>%
  summarize(Type_1_error_rate = mean(sig_neg | sig_pos)) %>%
  kable(digits = 3)
```

| simulation_type | Type_1_error_rate |
|-----------------|-------------------|
| abund           | 0.575             |
| env             | 0.501             |
| no_env          | 0.297             |

```
# Confidence interval coverage across all values
# What's the probability that any "true" value falls inside the 95% CI?
markov_summary %>%
  group_by(simulation_type) %>%
  summarize(mean(truth > lower & truth < upper)) %>%
```

```
kable(digits = 3)
```

| simulation_type | mean(truth > lower & truth < upper) |
|-----------------|-------------------------------------|
| abund           | 0.868                               |
| env             | 0.857                               |
| no_env          | 0.975                               |

## Plot root mean square error versus “true” beta

```
# Exclude the "abundance" simulations because the interpretation of  $\beta$   
# is different  
rmses = markov_summary %>%  
  filter(simulation_type != "abund") %>%  
  mutate(rmse = sqrt((truth - estimate)^2))  
  
ggplot(rmses, aes(x = truth, y = rmse)) +  
  geom_point(alpha = .2, size = 1) +  
  geom_smooth() +  
  theme_bw() +  
  coord_cartesian(ylim = c(0, max(rmses$rmse)))
```

```
## geom_smooth: method="auto" and size of largest group is >=1000, so using gam with formula: y
```

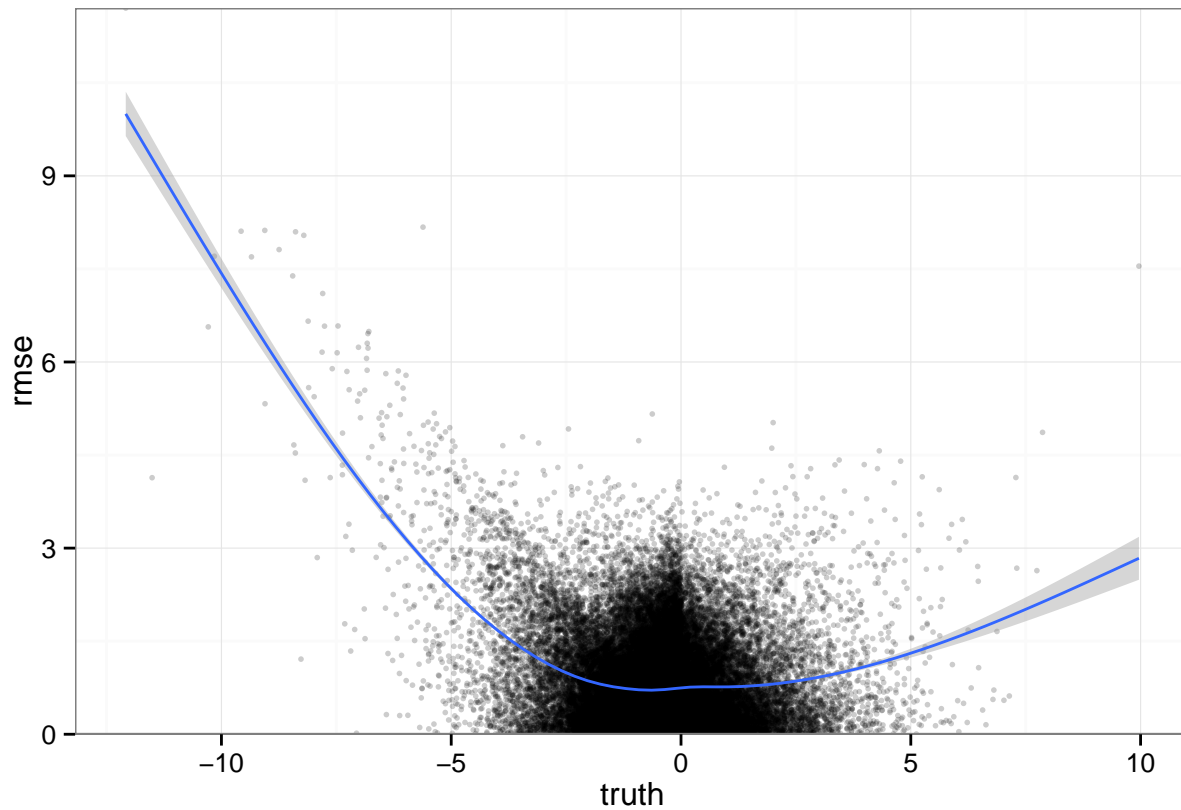

Plot confidence interval coverage versus true  $\beta$  value

```

# Coverage versus true beta value. The top and bottom 0.5%
# of the distribution have been omitted to prevent bad behavior
# by the smoother in the tails.
markov_summary %>%
  filter(percent_rank(truth) > .005 & percent_rank(truth) < .995) %>%
  mutate(covered = truth > lower & truth < upper) %>%
  ggplot(aes(x = truth, y = as.integer(covered))) +
  facet_grid(~simulation_type) +
  geom_smooth(method = gam, formula = y ~ s(x), family = binomial) +
  theme_bw() +
  coord_cartesian(ylim = c(0, 1)) +
  geom_vline(xintercept = 0) +
  geom_hline(yintercept = 0.95, color = "red") +
  ylab("Coverage")

```

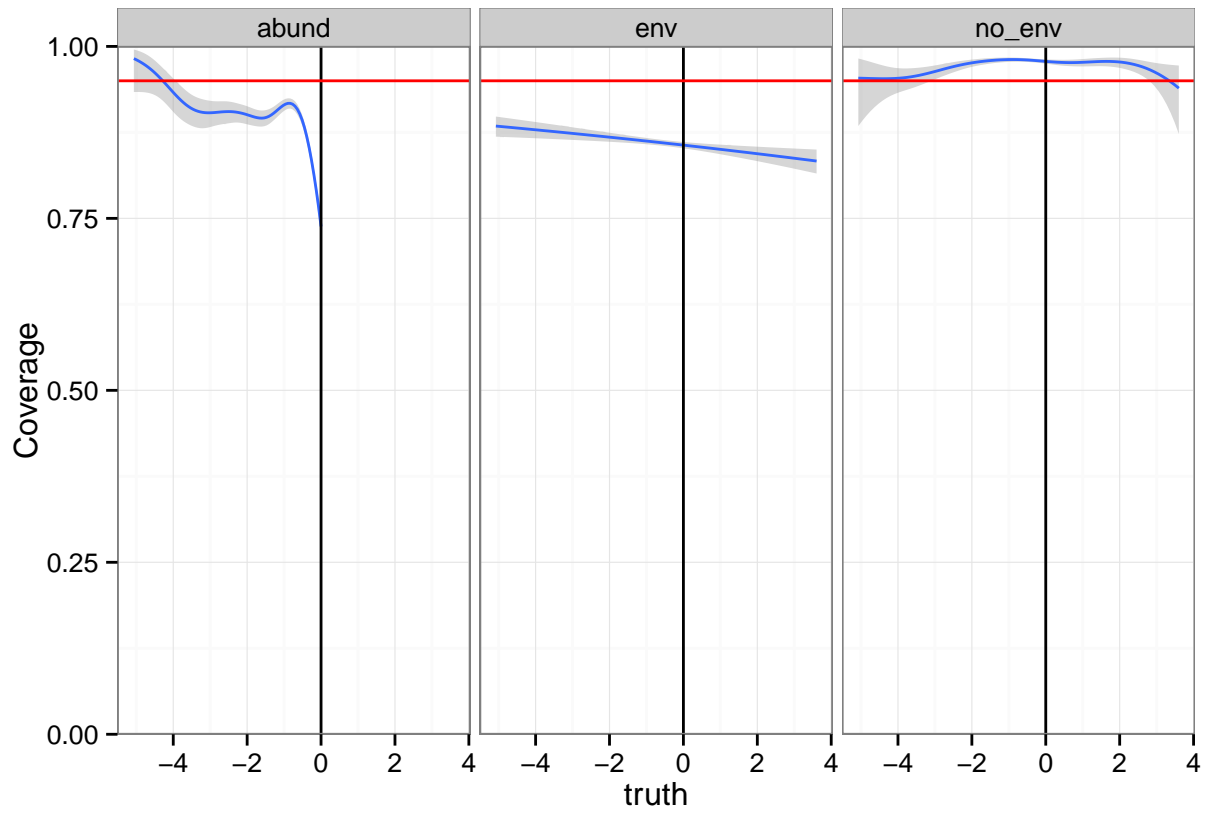

Supplement: Supplementary file [file 018861-4.pdf]
